# Supplementary material for: Enhancement of the photoluminescence efficiency of hybrid manganese halides through rational structural design
Source: Royal Society of Chemistry journal article supplement (doi:10.1039/d1cc02353e), 2021-01-01
Supplement: d1cc02353e1.pdf [file d1cc02353e1.pdf]

# Supporting Information

## Enhancing Photoluminescence Efficiencies of Hybrid Manganese Halides Through Rational Structural Design Strategy

Hong-Mei Pan,<sup>[a,b]</sup> Qian-Lu Yang,<sup>[a]</sup> Xin-Xin Xing,<sup>[a]</sup> Jia-Peng Li,<sup>[a]</sup> Fan-Lei Meng,<sup>[a]</sup> Xin Zhang,<sup>[a]</sup>  
Pan-Chao Xiao,<sup>[a]</sup> Cheng-Yang Yue,<sup>\*[a]</sup> Xiao-Wu Lei<sup>\*[a]</sup>

<sup>a</sup>Department of Chemistry and Chemical Engineering, Jining University, Qufu, Shandong, 273155,  
P. R. China

<sup>b</sup>College of Chemistry and Chemical Engineering, Qufu Normal University, Qufu, Shandong,  
273165, P. R. China

*\*Corresponding author: Cheng-Yang Yue, Xiao-Wu Lei*

*E-mail address: yuechengyang@126.com; xwlei\_jnu@163.com*

## Experimental Section

### Materials

All chemicals were purchased and used without any further purification: 1-(2-Dimethylaminoethyl)-4-methylpiperazine (DMAEMP, 98%, Macklin), 1-propyl-2,3-dimethylimidazolium chloride ([PDMIm]Cl, 99%, Licp), 1-methyl-piperazine (MP, 99%, Aladdin), N,N'-dimethyl-piperazine (DMP, 98%, Aladdin), 1-ethyl-piperazine (EP, 98%, Aladdin), manganese chloride tetrahydrate ( $\text{MnCl}_2 \cdot 4\text{H}_2\text{O}$ ) (Aladdin), ethanol absolute (99.7%, SCR), hydrochloric acid (36%, SCR), N,N-Dimethylacetamide (DMA) (99%, SCR).

**Synthesis of [DMAEMP]MnCl<sub>4</sub>.** A mixture of 0.1 g  $\text{MnCl}_2 \cdot 4\text{H}_2\text{O}$ , 0.094 g DMAEMP, 5 mL ethanol absolute and 0.5 mL hydrochloric acid was added into a 25 mL glass bottle followed by 15 min stirring for sufficient dispersion. The glass bottle was then sealed and heated at 80 °C for 5 day. After 5 day, green crystals of [DMAEMP]MnCl<sub>4</sub> were isolated after vacuum filtration, and washed with ethanol three times. The colorless crystals of [DMAEMP]MnCl<sub>4</sub> were obtained with a yield of 67% based on  $\text{MnCl}_2 \cdot 4\text{H}_2\text{O}$ . Elemental analysis calculated for  $\text{C}_{16}\text{N}_4\text{H}_{30}\text{MnCl}_4$ : C, 29.21%, N, 11.36%, H, 6.26%; found: C, 29.26%; N, 11.28%, H, 6.29%.

**Synthesis of [PDMIm]<sub>2</sub>MnCl<sub>4</sub>.** Single crystals of [PDMIm]<sub>2</sub>MnCl<sub>4</sub> were grown from ethanol solution with [PDMIm]Cl and  $\text{MnCl}_2 \cdot 4\text{H}_2\text{O}$  as raw materials. The stoichiometric mixture of  $\text{MnCl}_2 \cdot 4\text{H}_2\text{O}$  (0.198 g) and [PDMIm]Cl (0.349 g) was dissolved in 5 mL of ethanol solution and heated to 100 °C under continuous stirring, forming a colorless solution, which was slowly cooled to room temperature. One day later the target compound was obtained. The colorless crystals of [PDMIm]<sub>2</sub>MnCl<sub>4</sub> were obtained with a yield of 61% based on  $\text{MnCl}_2 \cdot 4\text{H}_2\text{O}$ . Elemental analysis calculated for  $\text{C}_{16}\text{N}_4\text{H}_{30}\text{MnCl}_4$ : C, 40.44 %, N, 11.79 %, H, 6.36 %; found: C, 40.52 %, N, 11.83 %, H, 6.29%.

H, 6.24 %.

**Synthesis of [MP]<sub>2</sub>MnCl<sub>4</sub>·2Cl.** A mixture of 0.1 g MnCl<sub>2</sub>·4H<sub>2</sub>O, 0.133 g MP, 5 mL ethanol and 0.5 mL hydrochloric acid was added into a 25 mL glass bottle followed by 15 min stirring for sufficient dispersion. The glass bottle was then sealed and heated at 80 °C for 5 days. After 5 days, slight green crystals of [MP]<sub>2</sub>MnCl<sub>4</sub>·2Cl were isolated after vacuum filtration, and washed with ethanol. The colorless crystals of [MP]<sub>2</sub>MnCl<sub>4</sub>·2Cl were obtained with a yield of 42% based on MnCl<sub>2</sub>·4H<sub>2</sub>O. Elemental analysis calculated for C<sub>16</sub>N<sub>4</sub>H<sub>30</sub>MnCl<sub>4</sub>: C, 25.45%, N, 11.87%, H, 5.98 %; found: C, 25.39%, N, 11.92%; H, 6.03%.

**Synthesis of [DMP]MnCl<sub>4</sub>.** A mixture of 0.1 g MnCl<sub>2</sub>·4H<sub>2</sub>O, 0.111 g DMP, 5 mL ethanol and 0.5 mL hydrochloric acid was added into a 25 mL glass bottle followed by 15 min stirring for sufficient dispersion. The glass bottle was then sealed and heated at 80 °C for 5 days. After 5 days, slight green crystals of [DMP]MnCl<sub>4</sub> were isolated after vacuum filtration, and washed with ethanol three times. The colorless crystals of [DMP]MnCl<sub>4</sub> were obtained with a yield of 31% based on MnCl<sub>2</sub>·4H<sub>2</sub>O. Elemental analysis calculated for C<sub>16</sub>N<sub>4</sub>H<sub>30</sub>MnCl<sub>4</sub>: C, 23.03%; N, 8.95%; H, 5.15%; found: C, 22.97%; N, 9.11%; H, 5.02%.

**Synthesis of [EP]MnCl<sub>4</sub>.** A mixture of 0.1 g MnCl<sub>2</sub>·4H<sub>2</sub>O, 0.112 g EP, 5 mL ethanol absolute and 0.5 mL hydrochloric acid was added into a 25 mL glass bottle followed by 15 min stirring for sufficient dispersion. The glass bottle was then sealed and heated at 80 °C for 5 days. After 5 day, slight green crystals of [EP]MnCl<sub>4</sub> were isolated after vacuum filtration, and washed with ethanol. The colorless crystals of [EP]MnCl<sub>4</sub> were obtained with a yield of 45% based on MnCl<sub>2</sub>·4H<sub>2</sub>O. Elemental analysis calculated for C<sub>16</sub>N<sub>4</sub>H<sub>30</sub>MnCl<sub>4</sub>: C, 23.03%; N, 8.95%; H, 5.15%; found: C, 23.01%; N, 8.99%; H, 5.12%.

## Characterizations

**Single crystal X-Ray diffraction (SCXRD):** A Bruker D8 diffractometer with Mo  $K\alpha$  radiation ( $\lambda = 0.71073\text{\AA}$ ) was utilized for single crystal X-ray diffraction. The APEX3 software was used for data reduction and multi-scans absorption correction. SHELXTL software was applied to solve crystal structure using direct methods. And the structure was refined by the full matrix method based on  $F^2$  using the package SHELXTL-97. All nonhydrogen atoms of the structure were refined with anisotropic thermal parameters. Symmetry analysis on the model using PLATON revealed that no obvious space group change was needed.

**Powder X-ray diffraction (PXRD):** A Rigaku MiniFlex II diffractometer equipped with a Cu  $K\alpha$  radiation was used for powder X-ray diffraction (PXRD) at room temperature. Collection  $2\theta$  range from  $5^\circ$  to  $60^\circ$  and step size is  $5^\circ/\text{min}$ .

**Thermogravimetric analysis (TGA):** Thermogravimetric analysis (TGA) measurement was implemented on a Netzsch STA 449C thermal analyser with a heating rate of 20 K/min from 35 K to 800 K under  $\text{N}_2$  atmosphere.

**Photoluminescent property characterizations:** The PL spectra were performed on an Edinburgh FLS980 fluorescence spectrometer. The photoluminescence quantum efficiency (PLQE) was achieved by incorporating an integrating sphere into the FLS980 spectrofluorometer. The PLQE was calculated based on the equation:  $\eta_{\text{QE}} = I_{\text{S}}/(E_{\text{R}}-E_{\text{S}})$ , which  $I_{\text{S}}$  represents the luminescence emission spectrum of the sample,  $E_{\text{R}}$  is the spectrum of the excitation light from the empty integrated sphere (without the sample), and  $E_{\text{S}}$  is the excitation spectrum for exciting the sample. The time-resolved decay data were carried out using the Edinburgh FLS980 fluorescence spectrometer with a picosecond pulsed diode laser. The average lifetime was obtained by exponential fitting.

**Fabrication of colorful Phosphors and white LED.** The white LEDs were fabricated by integrating the green [DMAEMP]MnCl<sub>4</sub> phosphor, commercial red phosphor of K<sub>2</sub>SiF<sub>6</sub>:Mn<sup>4+</sup> (Shenzhen looking long Technology Co., Ltd, China), commercial blue phosphor of BaMgAl<sub>10</sub>O<sub>17</sub>:Eu<sup>2+</sup> (Shenzhen looking long Technology Co., Ltd, China) and UV chip (365 nm, 3V, 300 mA, Shenzhen looking long Technology Co., Ltd, China). The phosphors were thoroughly mixed using an epoxy resin and the obtained mixture was coated on the LED chip. The electrical photoelectric properties, such as, the emission spectrum, color temperature (CCT), color rendering index (*R<sub>a</sub>*) and CIE color coordinate of the LED were collected using an integrating sphere spectroradiometer system (EVERFINE HAAS-2000). The as-fabricated white LEDs were operated at 3 V in varied drive currents from 20 to 120 mA.

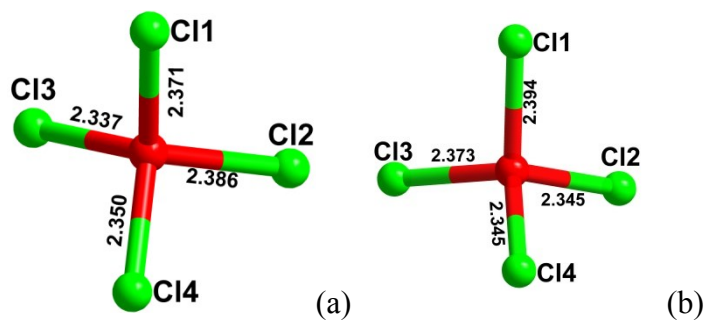

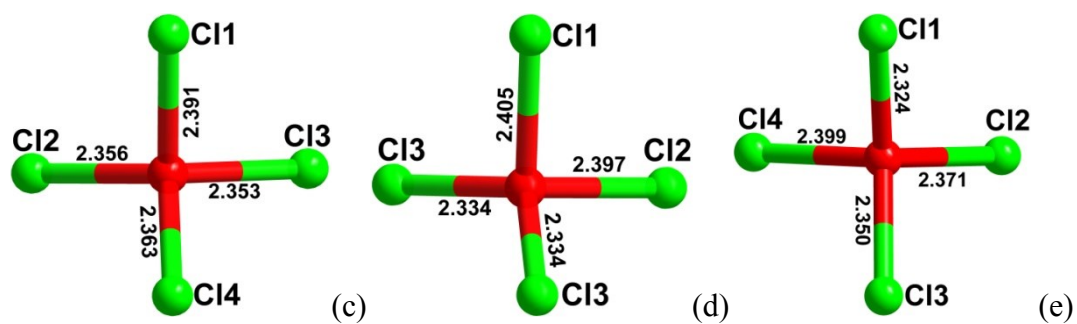

**Fig. S1.** The detailed coordination configurations of  $[\text{MnCl}_4]^{2-}$  tetrahedrons in compounds  $[\text{DMAEMP}]\text{MnCl}_4$  (a),  $[\text{PDMIIm}]_2\text{MnCl}_4$  (b),  $[\text{MP}]_2\text{MnCl}_4 \cdot 2\text{Cl}$  (c),  $[\text{DMP}]\text{MnCl}_4$  (d) and  $[\text{EP}]\text{MnCl}_4$  (e).

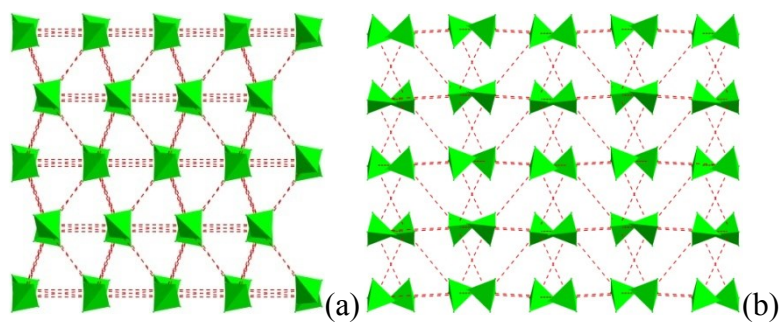

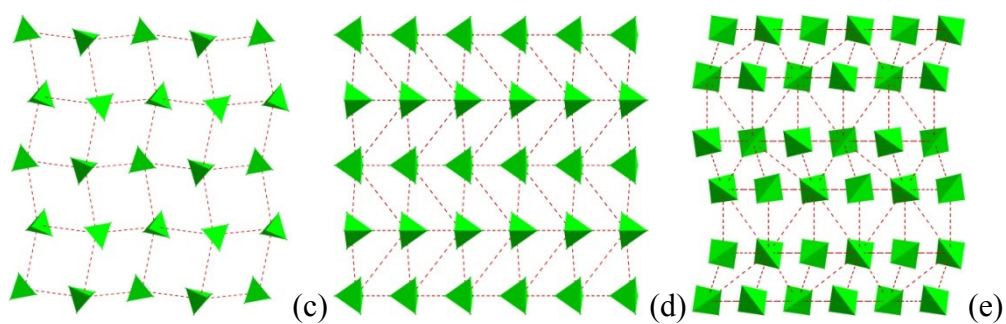

**Fig. S2.** The stacking manner of  $[\text{MnCl}_4]^{2-}$  tetrahedrons in compounds  $[\text{DMAEMP}]\text{MnCl}_4$  (a),  $[\text{PDMIIm}]_2\text{MnCl}_4$  (b),  $[\text{MP}]_2\text{MnCl}_4 \cdot 2\text{Cl}$  (c),  $[\text{DMP}]\text{MnCl}_4$  (d) and  $[\text{EP}]\text{MnCl}_4$  (e). The green polyhedron represent the  $[\text{MnCl}_4]^{2-}$  units.

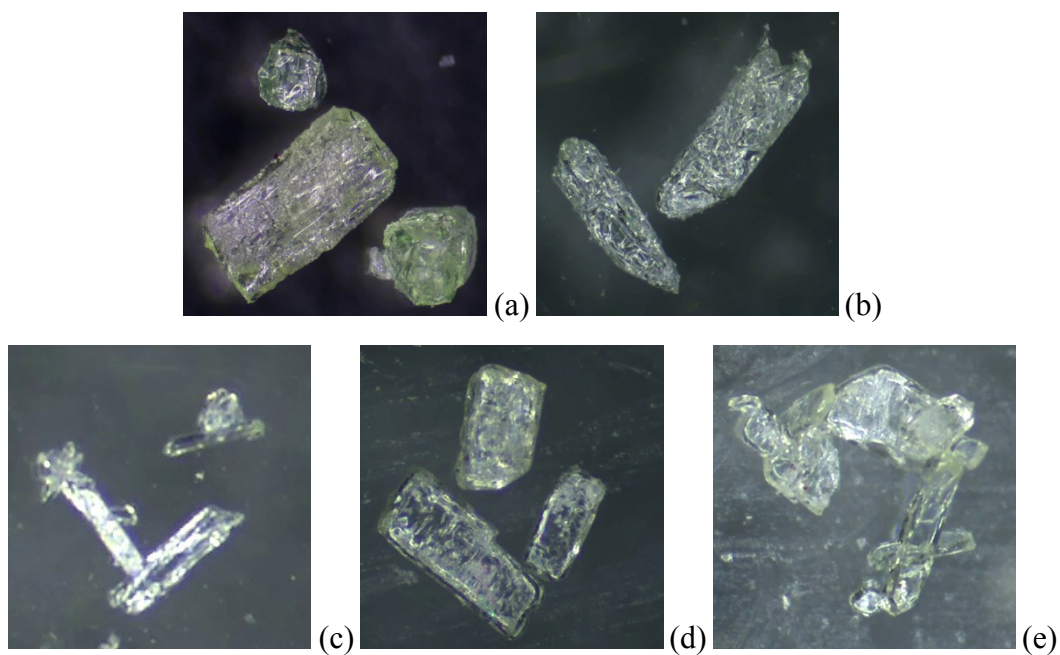

**Fig. S3.** The photo images of bulk crystals in compounds  $[\text{DMAEMP}]\text{MnCl}_4$  (a),  $[\text{PDMIIm}]_2\text{MnCl}_4$  (b),  $[\text{MP}]_2\text{MnCl}_4 \cdot 2\text{Cl}$  (c),  $[\text{DMP}]\text{MnCl}_4$  (d) and  $[\text{EP}]\text{MnCl}_4$  (e).

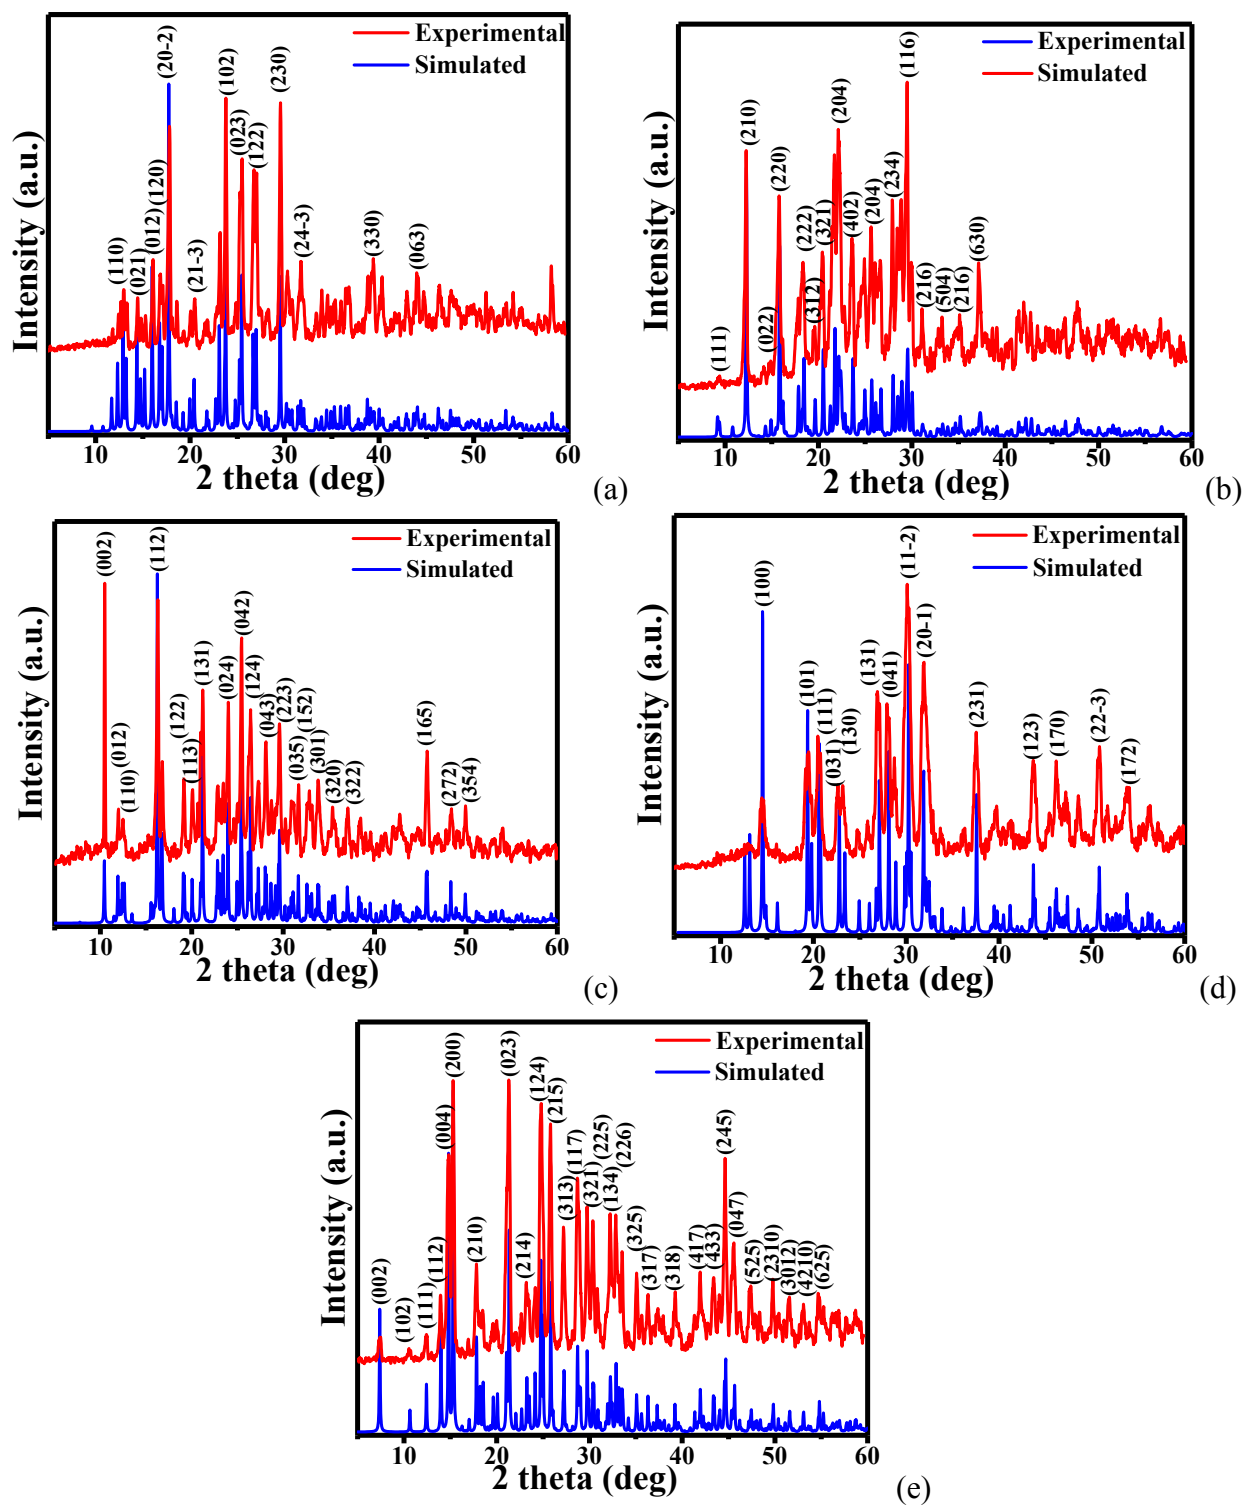

**Fig. S4.** The simulated and experimental PXRD patterns of [DMAEMP]MnCl<sub>4</sub> (a), [PDMIIm]<sub>2</sub>MnCl<sub>4</sub> (b), [MP]<sub>2</sub>MnCl<sub>4</sub>·2Cl (c), [DMP]MnCl<sub>4</sub> (d) and [EP]MnCl<sub>4</sub> (e).



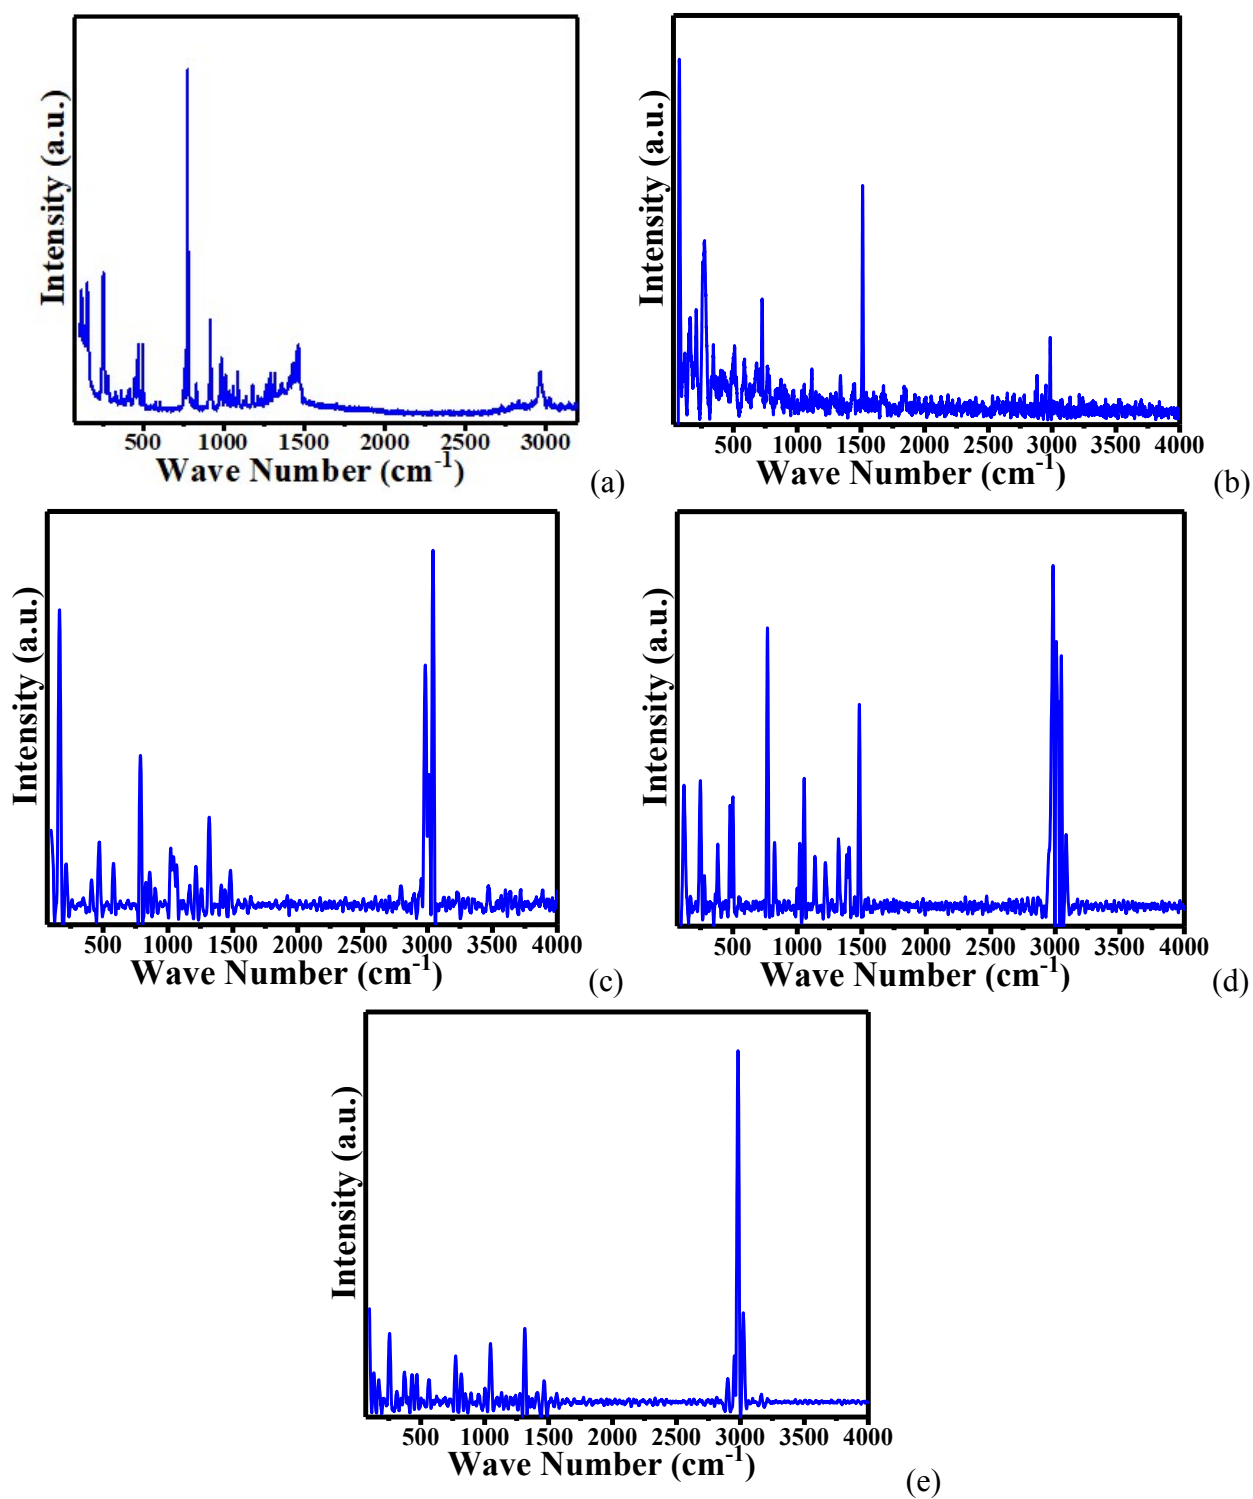

**Fig. S5.** Raman spectrum of  $[\text{DMAEMP}]\text{MnCl}_4$  (a),  $[\text{PDMIIm}]_2\text{MnCl}_4$  (b),  $[\text{MP}]_2\text{MnCl}_4 \cdot 2\text{Cl}$  (c),  $[\text{DMP}]\text{MnCl}_4$  (d) and  $[\text{EP}]\text{MnCl}_4$  (e).

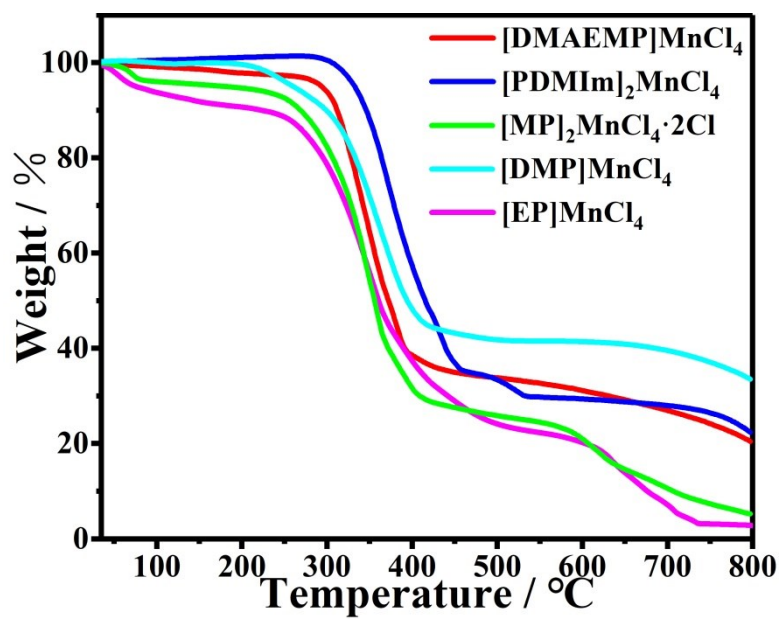

**Fig. S6.** The thermogravimetric analyses (TGA) curves for [DMAEMP]MnCl<sub>4</sub>, [PDMIm]<sub>2</sub>MnCl<sub>4</sub>, [MP]<sub>2</sub>MnCl<sub>4</sub>·2Cl, [DMP]MnCl<sub>4</sub> and [EP]MnCl<sub>4</sub>

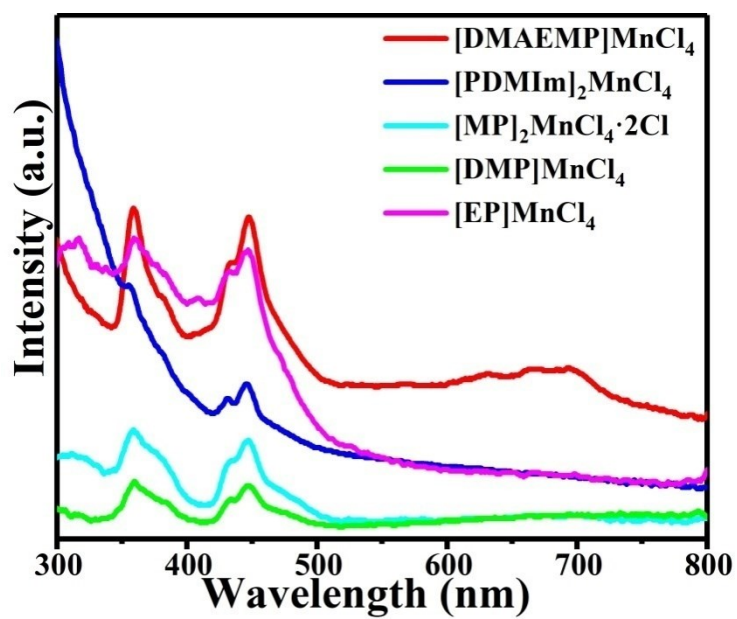

**Fig. S7.** The solid state absorption optical spectra of [DMAEMP]MnCl<sub>4</sub>, [PDMIIm]<sub>2</sub>MnCl<sub>4</sub>, [MP]<sub>2</sub>MnCl<sub>4</sub>·2Cl, [DMP]MnCl<sub>4</sub> and [EP]MnCl<sub>4</sub> at 300 K.

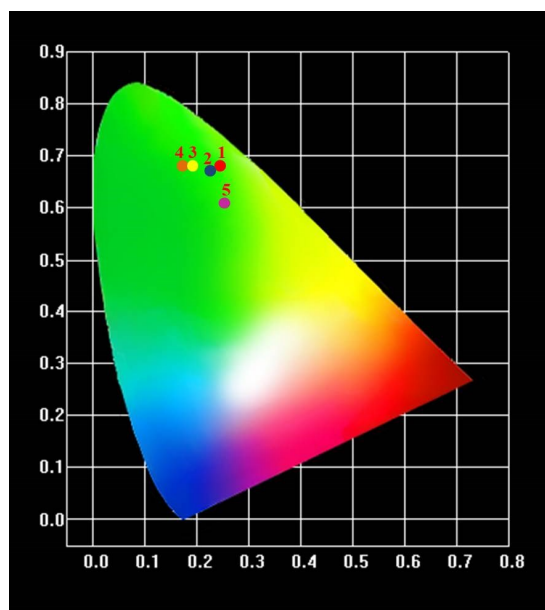

**Fig. S8.** The CIE chromaticity coordinates of [DMAEMP]MnCl<sub>4</sub> (1), [PDMIm]<sub>2</sub>MnCl<sub>4</sub> (2), [MP]<sub>2</sub>MnCl<sub>4</sub>·2Cl (3), [DMP]MnCl<sub>4</sub> (4) and [EP]MnCl<sub>4</sub> (5).

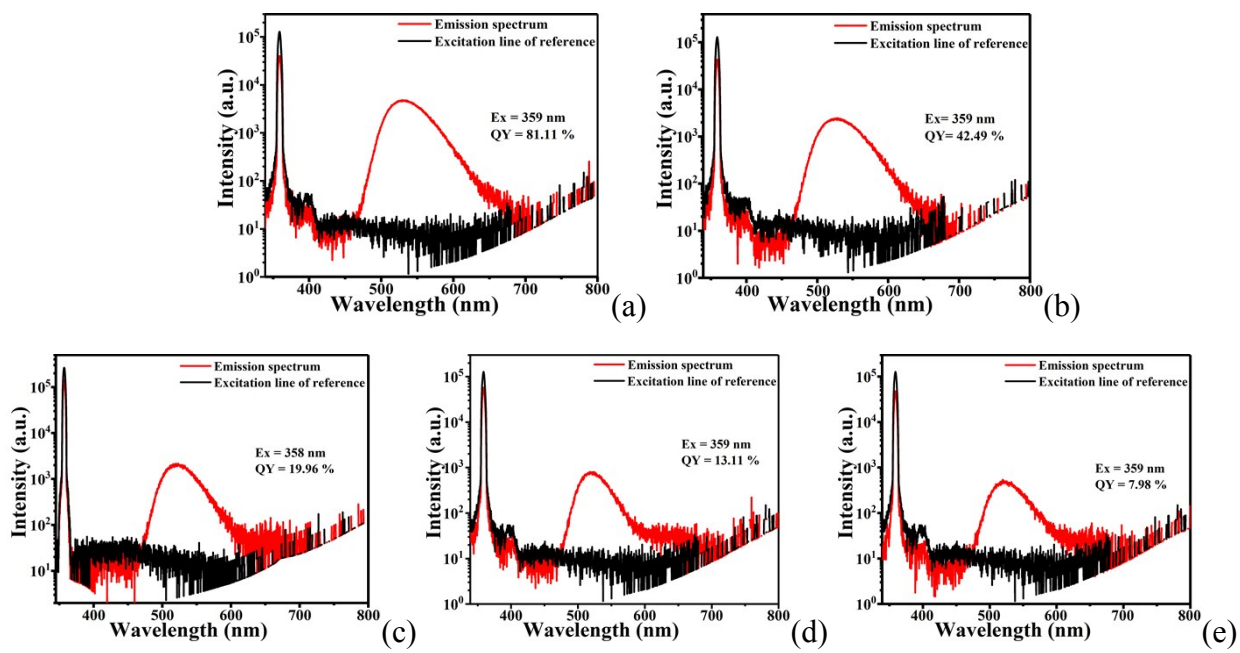

**Fig. S9.** The PLQYs of [DMAEMP]MnCl<sub>4</sub> (a), [PDMIIm]<sub>2</sub>MnCl<sub>4</sub> (b), [MP]<sub>2</sub>MnCl<sub>4</sub>·2Cl (c), [DMP]MnCl<sub>4</sub> (d) and [EP]MnCl<sub>4</sub> (e).

**Table S1.** Comparison of photoluminescence parameters of green light emitting 0D hybrid manganese halides.

| Material                                                                                 | Emission | PLQY    | FWHM    | Lifetime  | Ref.      |
|------------------------------------------------------------------------------------------|----------|---------|---------|-----------|-----------|
| [Ph <sub>4</sub> P] <sub>2</sub> MnBr <sub>4</sub>                                       | 516 nm   | 98 %    | .....   | 0.355 ms  | 1         |
| (TMPEA) <sub>2</sub> MnBr <sub>4</sub>                                                   | 520 nm   | 98 %    | .....   | 0.096 ms  | 2         |
| (ETPP)MnBr <sub>4</sub>                                                                  | 517 nm   | 95 %    | 51 nm   | 0.318 ms  | 3         |
| (PD) <sub>2</sub> MnBr <sub>4</sub>                                                      | 521 nm   | 95 %    | 42 nm   | 0.263 ms  | 4         |
| LMnCl <sub>4</sub>                                                                       | 530 nm   | 92.3    | .....   | 1.54 ms   | 5         |
| (TPA) <sub>2</sub> MnBr <sub>4</sub>                                                     | 512 nm   | 89.2 %  | .....   | .....     | 6         |
| (BTMA) <sub>2</sub> MnBr <sub>4</sub>                                                    | 518 nm   | 88.8 %  | 46 nm   | 0.33 ms   | 7         |
| (BTMA) <sub>2</sub> MnBr <sub>4</sub>                                                    | 516 nm   | 88.5 %  | 48 nm   | .....     | 8         |
| (TBA) <sub>2</sub> MnBr <sub>4</sub>                                                     | 515 nm   | 85.1 %  | 47 nm   | 0.443 ms  | 9         |
| (PD) <sub>2</sub> MnCl <sub>4</sub>                                                      | 520 nm   | 82 %    | .....   | 0.384 ms  | 10        |
| [DMAEMP]MnCl <sub>4</sub>                                                                | 525 nm   | 81.11 % | 54 nm   | 3.26 ms   | This work |
| [P14]MnBr <sub>4</sub>                                                                   | 520 nm   | 81 %    | 55 nm   | 0.358 ms  | 11        |
| (Bmpy) <sub>2</sub> MnBr <sub>4</sub>                                                    | 528 nm   | 80.1 %  | 64 nm   | 0.326 ms  | 12        |
| (MPip)MnCl <sub>4</sub>                                                                  | 530 nm   | 79.4 %  | 60 nm   | 0.715 ms  | 13        |
| (TEA) <sub>2</sub> MnBr <sub>4</sub>                                                     | 516 nm   | 78.9 %  | .....   | .....     | 7         |
| (Bz(Me) <sub>3</sub> N) <sub>2</sub> MnCl <sub>4</sub>                                   | 547 nm   | 78 %    | 71.8nm  | 3.79 ms   | 14        |
| (BTMA) <sub>2</sub> MnBr <sub>4</sub>                                                    | 514 nm   | 72.3 %  | .....   | 0.236 ms  | 15        |
| (btmdme) <sub>2</sub> MnCl <sub>4</sub>                                                  | 516 nm   | 71.3 %  | .....   | .....     | 7         |
| (EMMI <sub>m</sub> ) <sub>2</sub> MnCl <sub>4</sub>                                      | 536 nm   | 70.8    | .....   | 3.90 ms   | 16        |
| BA <sub>2</sub> MnI <sub>4</sub>                                                         | 550 nm   | 68 %    | .....   | 0.0211 ms | 17        |
| (Bz(Me) <sub>3</sub> N) <sub>2</sub> MnBr <sub>4</sub>                                   | 516 nm   | 63 %    | 48.7nm  | 0.34 ms   | 14        |
| DIPA <sub>2</sub> MnBr <sub>4</sub>                                                      | 525 nm   | 62 %    | 62.9 nm | 1.44 ns   | 18        |
| [PP14]MnBr <sub>4</sub>                                                                  | 527 nm   | 55 %    | 64 nm   | 0.361 ms  | 11        |
| (IPTMA) <sub>2</sub> MnBr <sub>4</sub>                                                   | 497 nm   | 52.6 %  | .....   | .....     | 19        |
| [Py] <sub>2</sub> MnBr <sub>4</sub>                                                      | 525 nm   | 51.4 %  | .....   | .....     | 20        |
| (Bmpy) <sub>9</sub> [Pb <sub>3</sub> Br <sub>11</sub> ](MnBr <sub>4</sub> ) <sub>2</sub> | 528 nm   | 49.8 %  | 67 nm   | 0.114 ms  | 21        |
| Cs <sub>3</sub> MnBr <sub>5</sub>                                                        | 520 nm   | 49 %    | 42 nm   | 0.29 ms   | 22        |

|                                                             |        |         |         |          |           |
|-------------------------------------------------------------|--------|---------|---------|----------|-----------|
| (TPP) <sub>2</sub> MnCl <sub>4</sub>                        | 517 nm | 48 %    | .....   | 1.97 ms  | 23        |
| [Bu <sub>4</sub> N] <sub>2</sub> MnBr <sub>4</sub>          | 520 nm | 47 %    | .....   | 0.35 ms  | 24        |
| [Ph <sub>4</sub> P] <sub>2</sub> MnBr <sub>4</sub>          | 520 nm | 47 %    | .....   | 0.35 ms  | 24        |
| [(btz) <sub>2</sub> (MnCl <sub>4</sub> )]·2H <sub>2</sub> O | 530 nm | 43.2 %  | .....   | .....    | 25        |
| [MMPrIm]MnCl <sub>4</sub>                                   | 521 nm | 42.49 % | .....   | 3.527 ms | This work |
| (Mor) <sub>2</sub> MnCl <sub>4</sub>                        | 520 nm | 39 %    | .....   | 3.36 ms  | 26        |
| (KC) <sub>2</sub> MnBr <sub>4</sub>                         | 520 nm | 38.5 %  | .....   | 0.35 ms  | 27        |
| (Bz(Me) <sub>3</sub> N) <sub>2</sub> MnI <sub>4</sub>       | 537 nm | 33 %    | 49.8 nm | 0.045 ms | 14        |
| [(btz) <sub>2</sub> (MnBr <sub>4</sub> )]·2H <sub>2</sub> O | 525 nm | 26.2 %  | .....   | .....    | 25        |
| (HEP) <sub>3</sub> MnBr <sub>5</sub>                        | 519 nm | 25.5 %  | .....   | 0.049 ms | 2         |
| [MP] <sub>2</sub> MnCl <sub>4</sub> ·2Cl                    | 516 nm | 19.96 % | 48 nm   | 2.89 ms  | This work |
| (PLD) <sub>2</sub> MnBr <sub>4</sub>                        | 520 nm | 19 %    | 42 nm   | 3.97 ns  | 28        |
| [PRD]MnBr <sub>4</sub>                                      | 525 nm | 16 %    | .....   | 0.73 ns  | 29        |
| [PRD]MnI <sub>4</sub>                                       | 550 nm | 15 %    | .....   | 0.19 ns  | 29        |
| [DMP]MnCl <sub>4</sub>                                      | 516 nm | 13.11 % | 43 nm   | 0.787 ms | This work |
| (3MP) <sub>2</sub> MnBr <sub>4</sub>                        | 523 nm | 13 %    | .....   | 0.019 ms | 2         |
| [ASN] <sub>2</sub> [MnBr <sub>4</sub> ]                     | 525 nm | 13 %    | 54 nm   | .....    | 30        |
| (N-EPD) <sub>2</sub> MnBr <sub>4</sub>                      | 515 nm | 12 %    | .....   | 0.188 ms | 10        |
| (3AMP)MnBr <sub>4</sub> ·H <sub>2</sub> O                   | 514 nm | 9.5 %   | .....   | 0.025 ms | 2         |
| [EP]MnCl <sub>4</sub>                                       | 518 nm | 7.98 %  | 56 nm   | 1.40 ms  | This work |
| (DMA) <sub>2</sub> MnBr <sub>4</sub>                        | 520 nm | 7.8 %   | .....   | 0.081 ms | 2         |
| (KC) <sub>2</sub> MnCl <sub>4</sub>                         | 518 nm | 7.8 %   | .....   | 2.79 ms  | 27        |
| [PRD]MnI <sub>4</sub>                                       | 540 nm | 4.4 %   | .....   | 0.51 ns  | 29        |

Ph<sub>4</sub>P=Tetraphenylphosphonium, TMPEA=trimethylphenylammonium, ETPP=ethylenebis-triphenylphosphonium, PD=pyridine, L=1-(cyclopentyl)-4-aza-1-azonia-bicyclo[2.2.2]octane, TPA=tetrapropylammonium, BTMA=Benzyltrimethyl ammonium, TBA=tetraethylammonium, P14=N-butyl-N-methylpyrrolidinium, Bmpy=1-butyl-1-methylpyrrolidinium, MPip=N-methylpiperidinium, TEA=tetraethylammonium, Bz(Me)<sub>3</sub>N=N-benzyl-N,N,N-trimethylammonium, btmdme=N-((1H-Benzotriazol-1-yl)methyl) - N,N-dimethylethanaminium, BA=n-butylamine, [EMMIm]=1-ethyl-2,3-dimethylimidazolium chloride, DIPA=Diisopropylammonium, PP14=N-butyl-N-methylpiperidinium, IPTMA = isopropyl-trimethylammonium, Py=pyrrolidinium, TPP=tetraphenylphosphonium, Bu<sub>4</sub>N=Tetrabutylammonium, Btz=benzothiazole, Mor=morpholine, KC=K(dibenzo-18-crown-6), HEP=heptamethylenimine, PLD=pyrrolidine, PRD=pyrrolidine, 3MP=methylpiperidinium, ASN=5-azonia-spiro[4,4]nonane, N-EPD=N-ethyl pyridine, 3AMP=3-aminomethylpiperidinium, DMA=dimethylammonium.

**Table S2.** Summary of the photophysical properties for title hybrid manganese halides at 300 K.

|            | $\lambda_{em}/nm$ | FWHM/nm | Lifetime/ms | $\Phi/\%$ |
|------------|-------------------|---------|-------------|-----------|
| Compound 1 | 525               | 54      | 3.26        | 81.11     |
| Compound 2 | 521               | 56      | 3.53        | 42.50     |
| Compound 3 | 516               | 48      | 2.89        | 19.96     |
| Compound 4 | 516               | 43      | 0.79        | 13.11     |
| Compound 5 | 526               | 56      | 1.40        | 7.98      |

$\lambda_{em}$  represent the of maximum emission wavelengths and  $\Phi$  is PLQY.

**Table S3.** Separation distances ( $\text{\AA}$ ) of Mn $\cdots$ Mn for neighboring  $[\text{MnCl}_4]^{2-}$  tetrahedrons in the title hybrid manganese halides.

|                                    | [DMAEMP]Mn<br>Cl <sub>4</sub> | [PDMIm] <sub>2</sub> Mn<br>Cl <sub>4</sub> | [MP] <sub>2</sub> MnCl <sub>4</sub> ·<br>2Cl | [DMP]MnCl<br>4 | [EP]MnCl <sub>4</sub> |
|------------------------------------|-------------------------------|--------------------------------------------|----------------------------------------------|----------------|-----------------------|
| $d(\text{Mn-Mn})/\text{\AA}$       | 7.727                         | 8.478                                      | 8.047                                        | 6.112          | 6.188                 |
| $d(\text{Mn-Mn})/\text{\AA}$       | 8.346                         | 8.478                                      | 8.047                                        | 6.945          | 6.62                  |
| $d(\text{Mn-Mn})/\text{\AA}$       | 8.551                         | 8.923                                      | 8.265                                        | 8.019          | 7.943                 |
| $d(\text{Mn-Mn})/\text{\AA}$       | 9.757                         | 8.923                                      | 8.265                                        | 8.097          | 8.001                 |
| $d(\text{Mn-Mn})/\text{\AA}$       | 9.578                         | 9.323                                      | 8.695                                        | 9.213          | 8.494                 |
| $d(\text{Mn-Mn})/\text{\AA}$       | 9.996                         | 9.417                                      | 8.695                                        | 9.29           | 8.461                 |
| $d(\text{Mn-Mn})/\text{\AA}$       | 10.978                        | 9.417                                      | 9.32                                         | 9.769          | 8.601                 |
| $d(\text{Mn-Mn})/\text{\AA}$       | 10.978                        | 10.064                                     | 9.32                                         | 9.797          | 8.914                 |
| $d_{ave}(\text{Mn-Mn})/\text{\AA}$ | 9.49                          | 9.12                                       | 8.58                                         | 8.40           | 7.90                  |
| PLQY                               | 81.11%                        | 42.49%                                     | 19.96%                                       | 13.11%         | 7.98%                 |



**Table S4.** Crystal data and structural refinements for the title compounds **1-3**.

| Compound                                                                                          | [DMAEMP]MnCl <sub>4</sub><br>(1)                                | [PDMIm] <sub>2</sub> MnCl <sub>4</sub><br>(2)                    | [MP] <sub>2</sub> MnCl <sub>4</sub> ·2Cl<br>(3)                  |
|---------------------------------------------------------------------------------------------------|-----------------------------------------------------------------|------------------------------------------------------------------|------------------------------------------------------------------|
| chemical formula                                                                                  | C <sub>9</sub> N <sub>3</sub> H <sub>23</sub> MnCl <sub>4</sub> | C <sub>16</sub> N <sub>4</sub> H <sub>30</sub> MnCl <sub>4</sub> | C <sub>10</sub> N <sub>4</sub> H <sub>28</sub> MnCl <sub>6</sub> |
| fw                                                                                                | 370.04                                                          | 478.15                                                           | 472                                                              |
| Space group                                                                                       | <i>P</i> 2 <sub>1</sub> / <i>c</i> (No.14)                      | <i>Pbca</i> (No.61)                                              | <i>P</i> 2 <sub>1</sub> 2 <sub>1</sub> 2 <sub>1</sub> (No.19)    |
| <i>a</i> /Å                                                                                       | 9.9960(2)                                                       | 16.387(4)                                                        | 8.04650(10)                                                      |
| <i>b</i> /Å                                                                                       | 14.3562(2)                                                      | 15.292(4)                                                        | 15.39100(10)                                                     |
| <i>c</i> /Å                                                                                       | 15.3780(3)                                                      | 18.810(5)                                                        | 16.93960(10)                                                     |
| <i>V</i> (Å <sup>3</sup> )                                                                        | 1723.35(5)                                                      | 4714(2)                                                          | 2097.86(3)                                                       |
| <i>Z</i>                                                                                          | 4                                                               | 8                                                                | 4                                                                |
| <i>D</i> <sub>calcd</sub> (g·cm <sup>-3</sup> )                                                   | 1.426                                                           | 1.339                                                            | 1.494                                                            |
| Temp (K)                                                                                          | 296(2)                                                          | 296(2)                                                           | 296(2)                                                           |
| $\mu$ (mm <sup>-1</sup> )                                                                         | 11.815                                                          | 1.021                                                            | 12.136                                                           |
| <i>F</i> (000)                                                                                    | 764                                                             | 1976                                                             | 972                                                              |
| Reflections collected                                                                             | 10246                                                           | 29234                                                            | 48524                                                            |
| Unique reflections                                                                                | 3461                                                            | 4148                                                             | 4312                                                             |
| Reflections ( <i>I</i> >2 $\sigma$ ( <i>I</i> ))                                                  | 3042                                                            | 3964                                                             | 4189                                                             |
| GOF on <i>F</i> <sup>2</sup>                                                                      | 1.042                                                           | 1.068                                                            | 1.036                                                            |
| <i>R</i> <sub>1</sub> , <i>wR</i> <sub>2</sub> ( <i>I</i> > 2 $\sigma$ ( <i>I</i> )) <sup>a</sup> | 0.0351/0.0962                                                   | 0.0563/0.1634                                                    | 0.0246/0.0609                                                    |
| <i>R</i> <sub>1</sub> , <i>wR</i> <sub>2</sub> (all data)                                         | 0.0417/0.1083                                                   | 0.0602/0.1667                                                    | 0.0260/0.0620                                                    |

<sup>a</sup>  $R_1 = \Sigma ||F_0| - |F_c|| / \Sigma |F_0|$ ,  $wR_2 = [\Sigma (F_0^2 - F_c^2) / \Sigma w(F_0)^2]^{1/2}$

**Table S5.** Crystal data and structural refinements for the title compounds **4-5**.

| Compound                                                                                          | [DMP]MnCl <sub>4</sub><br>(4)                                   | [EP]MnCl <sub>4</sub><br>(5)                                    |
|---------------------------------------------------------------------------------------------------|-----------------------------------------------------------------|-----------------------------------------------------------------|
| chemical formula                                                                                  | C <sub>6</sub> N <sub>2</sub> H <sub>16</sub> MnCl <sub>4</sub> | C <sub>6</sub> N <sub>2</sub> H <sub>16</sub> MnCl <sub>4</sub> |
| fw                                                                                                | 312.95                                                          | 312.95                                                          |
| Space group                                                                                       | <i>P2<sub>1</sub>/m</i> (No.11)                                 | <i>Pbca</i> (No.61)                                             |
| <i>a</i> /Å                                                                                       | 6.1119(2)                                                       | 11.5561(2)                                                      |
| <i>b</i> /Å                                                                                       | 14.5023(5)                                                      | 9.7596(2)                                                       |
| <i>c</i> /Å                                                                                       | 6.9450(2)                                                       | 23.9095(5)                                                      |
| <i>V</i> (Å <sup>3</sup> )                                                                        | 615.56(3)                                                       | 2696.58(9)                                                      |
| <i>Z</i>                                                                                          | 2                                                               | 8                                                               |
| <i>D</i> <sub>calcd</sub> (g·cm <sup>-3</sup> )                                                   | 1.688                                                           | 1.542                                                           |
| Temp (K)                                                                                          | 296(2)                                                          | 296(2)                                                          |
| $\mu$ (mm <sup>-1</sup> )                                                                         | 16.393                                                          | 14.969                                                          |
| <i>F</i> (000)                                                                                    | 318                                                             | 1272                                                            |
| Reflections collected                                                                             | 1958                                                            | 8628                                                            |
| Unique reflections                                                                                | 1057                                                            | 2659                                                            |
| Reflections ( <i>I</i> >2 $\sigma$ ( <i>I</i> ))                                                  | 976                                                             | 2391                                                            |
| GOF on <i>F</i> <sup>2</sup>                                                                      | 1.047                                                           | 1.007                                                           |
| <i>R</i> <sub>1</sub> , <i>wR</i> <sub>2</sub> ( <i>I</i> > 2 $\sigma$ ( <i>I</i> )) <sup>a</sup> | 0.0417/0.1188                                                   | 0.0390/0.1054                                                   |
| <i>R</i> <sub>1</sub> , <i>wR</i> <sub>2</sub> (all data)                                         | 0.0442/0.1232                                                   | 0.0437/0.1194                                                   |

<sup>a</sup>  $R_1 = \Sigma ||F_0| - |F_c|| / \Sigma |F_0|$ ,  $wR_2 = [\Sigma (F_0^2 - F_c^2) / \Sigma w(F_0^2)]^{1/2}$

**Table S6.** Selected bond lengths (Å) and bond angles (°) for [DMAEMP]MnCl<sub>4</sub>.

|                   |           |                   |           |
|-------------------|-----------|-------------------|-----------|
| Mn(1)-Cl(1)       | 2.3712(8) | Mn(1)-Cl(3)       | 2.3369(7) |
| Mn(1)-Cl(2)       | 2.3859(8) | Mn(1)-Cl(4)       | 2.3503(8) |
| Cl(1)-Mn(1)-Cl(2) | 111.19(4) | Cl(3)-Mn(1)-Cl(2) | 111.73(3) |
| Cl(3)-Mn(1)-Cl(1) | 108.47(3) | Cl(3)-Mn(1)-Cl(4) | 111.06(3) |
| Cl(4)-Mn(1)-Cl(1) | 112.63(3) | Cl(4)-Mn(1)-Cl(2) | 101.70(3) |

**Table S7.** Selected bond lengths (Å) and bond angles (°) for [PDMIm]<sub>2</sub>MnCl<sub>4</sub>.

|                     |           |                     |           |
|---------------------|-----------|---------------------|-----------|
| Mn(1)-Cl(1)         | 2.395(17) | Mn(1)-Cl(3)         | 2.373(6)  |
| Mn(1)-Cl(2)         | 2.35(3)   | Mn(1)-Cl(4)         | 2.35(3)   |
| Mn(1)-Cl(1A)        | 2.33(3)   | Mn(1)-Cl(3A)        | 2.32(3)   |
| Mn(1)-Cl(2A)        | 2.340(11) | Mn(1)-Cl(4A)        | 2.374(6)  |
| Cl(2)-Mn(1)-Cl(1)   | 108.9(10) | Cl(2)-Mn(1)-Cl(4)   | 105.5(18) |
| Cl(2)-Mn(1)-Cl(3)   | 111.1(12) | Cl(1)-Mn(1)-Cl(4)   | 116.0(12) |
| Cl(1)-Mn(1)-Cl(3)   | 105.5(6)  | Cl(3)-Mn(1)-Cl(4)   | 110.0(10) |
| Cl(3A)-Mn(1)-Cl(1A) | 116.2(17) | Cl(3A)-Mn(1)-Cl(2A) | 107.0(17) |
| Cl(1A)-Mn(1)-Cl(2A) | 102.0(13) | Cl(3A)-Mn(1)-Cl(4)  | 112.5(12) |
| Cl(1A)-Mn(1)-Cl(4)  | 114.6(14) | Cl(2A)-Mn(1)-Cl(4)  | 102.6(15) |
| Cl(3A)-Mn(1)-Cl(2)  | 103.3(19) | Cl(1A)-Mn(1)-Cl(2)  | 102.9(14) |
| Cl(1A)-Mn(1)-Cl(3)  | 112.3(15) | Cl(2A)-Mn(1)-Cl(3)  | 114.8(8)  |
| Cl(3A)-Mn(1)-Cl(4A) | 110.4(9)  | Cl(1A)-Mn(1)-Cl(4A) | 110.4(8)  |
| Cl(2A)-Mn(1)-Cl(4A) | 110.4(9)  | Cl(2A)-Mn(1)-Cl(1)  | 108.3(8)  |
| Cl(2)-Mn(1)-Cl(4A)  | 113.3(13) | Cl(3)-Mn(1)-Cl(4A)  | 107.0(4)  |
| Cl(3A)-Mn(1)-Cl(1)  | 109.8(11) | Cl(4A)-Mn(1)-Cl(1)  | 110.8(6)  |

**Table S8.** Selected bond lengths (Å) and bond angles (°) for [MP]<sub>2</sub>MnCl<sub>4</sub>·2Cl.

|                   |           |                   |           |
|-------------------|-----------|-------------------|-----------|
| Mn(1)-Cl(1)       | 2.3913(7) | Mn(1)-Cl(3)       | 2.3516(7) |
| Mn(1)-Cl(2)       | 2.3550(6) | Mn(1)-Cl(4)       | 2.3620(7) |
| Cl(3)-Mn(1)-Cl(2) | 115.89(3) | Cl(3)-Mn(1)-Cl(1) | 103.30(3) |
| Cl(3)-Mn(1)-Cl(4) | 109.26(3) | Cl(2)-Mn(1)-Cl(1) | 106.64(2) |
| Cl(2)-Mn(1)-Cl(4) | 112.69(3) | Cl(4)-Mn(1)-Cl(1) | 108.39(3) |

**Table S9.** Selected bond lengths (Å) and bond angles (°) for [DMP]MnCl<sub>4</sub>.

|                     |            |                     |           |
|---------------------|------------|---------------------|-----------|
| Mn(1)-Cl(1)         | 2.4050(13) | Mn(1)-Cl(3)         | 2.3336(8) |
| Mn(1)-Cl(2)         | 2.3973(13) | Mn(1)-Cl(3) #1      | 2.3336(8) |
| Cl(3)-Mn(1)-Cl(3)#1 | 120.79(5)  | Cl(3)-Mn(1)-Cl(1)   | 105.18(3) |
| Cl(3)-Mn(1)-Cl(2)   | 110.62(3)  | Cl(3)#1-Mn(1)-Cl(1) | 105.18(3) |
| Cl(3)#1-Mn(1)-Cl(2) | 110.62(3)  | Cl(2)-Mn(1)-Cl(1)   | 102.51(5) |

**Table S10.** Selected bond lengths (Å) and bond angles (°) for [EP]MnCl<sub>4</sub>.

|                   |           |                   |           |
|-------------------|-----------|-------------------|-----------|
| Mn(1)-Cl(1)       | 2.3243(8) | Mn(1)-Cl(3)       | 2.3497(8) |
| Mn(1)-Cl(2)       | 2.3709(8) | Mn(1)-Cl(4)       | 2.3987(8) |
| Cl(1)-Mn(1)-Cl(2) | 112.10(4) | Cl(2)-Mn(1)-Cl(4) | 106.41(3) |
| Cl(1)-Mn(1)-Cl(3) | 119.30(3) | Cl(3)-Mn(1)-Cl(2) | 106.97(3) |
| Cl(1)-Mn(1)-Cl(4) | 104.84(3) | Cl(3)-Mn(1)-Cl(4) | 106.37(3) |

**Table S11.** Hydrogen bonding data for [DMAEMP]MnCl<sub>4</sub>.

| <b>D-H...A</b>     | <b>d(D-H) (Å)</b> | <b>d(H...A) (Å)</b> | <b>d(D...A) (Å)</b> | <b>&lt;(DHA)(°)</b> |
|--------------------|-------------------|---------------------|---------------------|---------------------|
| N(2)-H(2)···N(1)   | 0.91              | 2.48                | 2.9205(1)           | 110                 |
| N(3)-H(3)···Cl(2)  | 0.91              | 2.32                | 3.1711(1)           | 156                 |
| C(2)-H(2A)···Cl(3) | 0.96              | 2.76                | 3.7109(1)           | 173                 |
| C(3)-H(3A)···Cl(3) | 0.97              | 2.79                | 3.7347(1)           | 164                 |
| C(4)-H(4A)···Cl(2) | 0.97              | 2.77                | 3.7225(1)           | 168                 |
| C(8)-H(8B)···Cl(4) | 0.97              | 2.79                | 3.5476(1)           | 135                 |

**Table S12.** Hydrogen bonding data for [PDMIm]<sub>2</sub>MnCl<sub>4</sub>.

| <b>D-H...A</b>            | <b>d(D-H) (Å)</b> | <b>d(H...A) (Å)</b> | <b>d(D...A) (Å)</b> | <b>&lt;(DHA)(°)</b> |
|---------------------------|-------------------|---------------------|---------------------|---------------------|
| C(2)-H(2)···Cl(3)         | 0.93              | 2.76                | 3.5804(10)          | 147                 |
| C(3)-H(3C)···Cl(3A)       | 0.96              | 2.77                | 3.4625(9)           | 130                 |
| C(5)-H(5A)···Cl(4A)       | 0.97              | 2.74                | 3.6747(10)          | 162                 |
| C(5)-H(5A)···Cl(4)        | 0.97              | 2.81                | 3.7430(10)          | 162                 |
| C(5)-H(5B)···Cl(2A)       | 0.97              | 2.76                | 3.6661(10)          | 155                 |
| C(5)-H(5B)···Cl(2)        | 0.97              | 2.66                | 3.5562(9)           | 153                 |
| C(9)-H(9)···Cl(4A)        | 0.93              | 2.68                | 3.5369(9)           | 154                 |
| C(9)-H(9)···Cl(4)         | 0.93              | 2.76                | 3.5830(10)          | 148                 |
| C(13)-<br>H(13B)···Cl(4A) | 0.96              | 2.83                | 3.7842(10)          | 174                 |

**Table S13.** Hydrogen bonding data for [MP]<sub>2</sub>MnCl<sub>4</sub>·2Cl.

| <b>D-H···A</b>     | <b>d(D-H) (Å)</b> | <b>d(H···A) (Å)</b> | <b>d(D···A) (Å)</b> | <b>&lt;(DHA)(°)</b> |
|--------------------|-------------------|---------------------|---------------------|---------------------|
| N(1)-H(1)···Cl(6)  | 0.91              | 2.10                | 3.0019(1)           | 173                 |
| N(2)-H(2A)···Cl(1) | 0.90              | 2.43                | 3.1823(1)           | 141                 |
| N(2)-H(2B)···Cl(4) | 0.90              | 2.54                | 3.2351(1)           | 134                 |
| N(3)-H(3)···Cl(5)  | 0.91              | 2.19                | 3.0730(1)           | 164                 |
| N(4)-H(4A)···Cl(5) | 0.90              | 2.31                | 3.0990(1)           | 147                 |
| N(4)-H(4B)···Cl(6) | 0.90              | 2.28                | 3.0949(1)           | 151                 |
| C(2)-H(2D)···Cl(5) | 0.97              | 2.82                | 3.4656(1)           | 125                 |
| C(3)-H(3A)···Cl(6) | 0.97              | 2.64                | 3.3997(1)           | 135                 |
| C(6)-H(6A)···Cl(3) | 0.97              | 2.74                | 3.7029(1)           | 175                 |
| C(8)-H(8A)···Cl(5) | 0.96              | 2.75                | 3.6638(1)           | 158                 |
| C(9)-H(9A)···Cl(6) | 0.97              | 2.72                | 3.4676(1)           | 134                 |

**Table S14.** Hydrogen bonding data for [DMP]MnCl<sub>4</sub>.

| <b>D-H···A</b>     | <b>d(D-H) (Å)</b> | <b>d(H···A) (Å)</b> | <b>d(D···A) (Å)</b> | <b>&lt;(DHA)(°)</b> |
|--------------------|-------------------|---------------------|---------------------|---------------------|
| N(1)-H(1)···Cl(1)  | 0.91              | 2.72                | 3.3928(1)           | 132                 |
| N(1)-H(1)···Cl(2)  | 0.91              | 2.65                | 3.3884(1)           | 139                 |
| C(1)-H(1B)···Cl(3) | 0.97              | 2.74                | 3.6364(10)          | 154                 |
| C(2)-H(2B)···Cl(3) | 0.97              | 2.79                | 3.6419(1)           | 147                 |

**Table S15.** Hydrogen bonding data for [EP]MnCl<sub>4</sub>.

| <b>D-H···A</b>     | <b>d(D-H) (Å)</b> | <b>d(H···A) (Å)</b> | <b>d(D···A) (Å)</b> | <b>&lt;(DHA)(°)</b> |
|--------------------|-------------------|---------------------|---------------------|---------------------|
| N(1)-H(1D)···Cl(2) | 0.90              | 2.33                | 3.1991(1)           | 162                 |
| N(1)-H(1E)···Cl(3) | 0.90              | 2.73                | 3.3349(1)           | 125                 |
| N(1)-H(1E)···Cl(4) | 0.90              | 2.55                | 3.2656(1)           | 137                 |
| N(2)-H(2C)···Cl(4) | 0.91              | 2.36                | 3.2176(1)           | 158                 |
| C(5)-H(5A)···Cl(2) | 0.97              | 2.79                | 3.7102(1)           | 159                 |

## Reference

1. L. J. Xu, C. Z. Sun, H. Xiao, Y. Wu and Z. N. Chen, *Adv. Mater.* 2017, **29**, 1605739.
2. L. L. Mao, P. J. Guo, S. X. Wang, A. K. Cheetham and R. Seshadri, *J. Am. Chem. Soc.* 2020, **142**, 13582–13589.
3. L. J. Xu, X. S. Lin, Q. Q. He, M. Worku and B. W. Ma, *Nat. Commun.* 2020, **11**, 4329.
4. G. C. Hu, B. Xu, A. F. Wang, Y. Guo, J. J. Wu, F. Muhammad, W. Meng, C.Y. Wang, S. Q. Sui, Y. Liu, Y. C. Li, Y. Zhang, Y. G. Zhou and Z. T. Deng, *Adv. Funct. Mater.*, 2021, **31**, 2011191.
5. Z. X. Wang, P. F. Li, W. Q. Liao, Y. Y. Tang, H.Y. Ye and Y. Zhang, *Chem. Asian. J.* 2016, **11**, 981-985.
6. S. Q. Chen, J. M. Gao, J. Y. Chang, Y. Zhang and L. Feng, *Sens. Actuators, B.* 2019, **297**, 126701.
7. G. J. Zhou, Z. Y. Liu, J. L. Huang, M. S. Molokeev, Z. W. Xiao, C. G. Ma and Z. G. Xia, *J. Phys. Chem. Lett.* 2020, **11**, 5956–5962.
8. H. M. Fu, C. L. Jiang, J. Lao, C. H. Luo, H. C. Lin, H. Peng and C. G. Duan, *CrystEngComm*, 2020, **22**, 1436-1441.
9. T. M. Jiang, W. B. Ma, H. Zhang, Y. Tian, G. Lin, W.G. Xiao, X. Yu, J. B. Qiu, X. H. Xu, Y. Yang and D.X. Ju, *Adv. Funct. Mater.*, 2021, **31**, 2009973.
10. L. Y. Li, L. Li, Q. Q. Li, Y. M. Shen, S. K. Pan and J. G.J. Pan, *Transit Metal Chem*, **45**, 413-421.
11. L. K. Gong, Q. Q. Hu, F. Q. Huang, Z. Z. Zhang, N. N. Shen, B. Hu, Y. Song, Z. P. Wang, K. Z. Du and X. Y. Huang, *Chem. Commun*, 2019, **55**, 7303–7306.
12. M. Z. Li, J. Zhou, G. J. Zhou, M. S. Molokeev, J. Zhao, V. Morad, M. V. Kovalenko and Z. G. Xia, *Angew. Chem. Int. Ed.*, 2019, **58**, 18670-18675.
13. Y. L. Wei, J. Jing, C. Shi, H. Y. Ye, Z. X. Wang and Y. Zhang, *Inorg. Chem. Front.* 2018, **5**, 2615-2619.
14. V. Morad, I. Cherniukh, L. Pöttschacher, Y. Shynkarenko, S. Yakunin and M. V. Kovalenko, *Chem. Mater.* 2019, **31**, 10161–10169.
15. X. W. Cai, Y. Y. Zhao, H. Li, C. P. Huang and Z. Zhou, *J. Mol. Struct.* 2018, **1161**, 262–266.
16. Y. D. Deng, X. H. Dong, M. Yang, H. M. Zeng, G. H. Zou and Z. E. Lin, *Dalton Trans.* 2019, **48**, 17451-17455.
17. X. M. Jiang, S. Q. Xia, J. Zhang, D. X. Ju, Y. Liu, X. B. Hu, L. Wang, Z. L. Chen and X. T. Tao, *ChemSusChem*, 2019, **12**, 5228-5232.
18. C. L. Jiang, N. Zhong, C. H. Luo, H. C. Lin, Y. Y. Zhang, H. Peng and C. G. Duan, *Chem. Commun.* 2017, **53**, 5954–5957.
19. Y. Y. Luo, Z. X. Zhang, C. Y. Su, W. Y. Zhang, P. P. Shi, Q. Ye and D. W. Fu, *J. Mater. Chem. C.* 2020, **8**, 7089–7095.
20. Y. X. Wu, C. F. Wang, H. H. Li, F. Jiang, C. Shi, H. Y. Ye and Y. Zhang, *Eur. J. Inorg. Chem.* 2020, **2020**, 394–399.
21. M. Z. Li, J. Zhou, G. J. Zhou, M. S. Molokeev, J. Zhao, V. Morad, M. V. Kovalenko, Z. G. Xia, *Angew. Chem. Int. Ed.*, 2019, **131**, 18843-18848.
22. B. B. Su, M. S. Molokeev and Z. G. Xia, *J. Mater. Chem. C*, 2019, **7**, 11220-11226.
23. L. J. Xu, A. Plaviak, X. S. Lin, M. Worku, Q. Q. He, M. Chaaban, B. J. Kim and B. W. Ma, *Angew. Chem. Int. Ed.*, 2020, **51**, 23067-23071.
24. A. Jana, S. Zhumagali, Q. Ba, A. S. Nissimagoudar and K. S. Kim, *J. Mater. Chem. A.* 2019, **7**, 26504– 26512.
25. H. Yu, Y. X. Mei, Z. H. Wei, G. Q. Mei and H. Cai, *J. Fluoresc.* 2016, **26**, 2295-2301.
26. M. E. Sun, Y. Li, X. Y. Dong and S. Q. Zang, *Chem. Sci*, 2019, **10**, 3836-3839.
27. J. Zhao, T. J. Zhang, X. Y. Dong, M. E. Sun, C. Zhang, X. L. Li, Y. S. Zhao and S. Q. Zang, *J. Am. Chem. Soc.* 2019, **141**, 15755–15760.
28. H. Peng, B. S. Zou, Y. C. Guo, Y. H. Xiao, R. N. Zhi, X. Y. Fan, M. Zou and J. P. Wang, *J. Mater. Chem. C*,



2020, **8**, 6488-6495.

29. C. L. Jiang, H. M. Fu, Y. Han, D. Li, H. C. Lin, B. Li, X. J. Meng, H. Peng and J. H. Chu, *Cryst. Res. Technol.* 2019, **54**, 1800236.

30. L. Xu, J. X. Gao, X. G. Chen, X. N. Hua and W. Q. Liao, *Dalton Trans.* 2018, **47**, 16995-17003.
